# Supplementary material
Source: PubMed Central journal article supplement (PMC7350997)
Supplement: ASN.2019101121SupplementaryData.pdf [file ASN.2019101121SupplementaryData.pdf]

## Table of Contents for the supplemental material

**Supplemental Table 1.** Area under ROC curve with original versus recalculated htTKV

**Supplemental Table 2.** Predicted %CKD with original versus recalculated htTKV

**Supplemental Table 3.** Goodness of Fit P-value according to Hosmer-Lemeshow test

**Supplemental Table 4.** TKV (mL) measured by slice-by-slice vs ellipsoid methods in Class 2Ae before and after exclusion of exophytic cysts

**Supplemental Figure 1.** TKV measurement using ellipsoid method in two patients with Class 2Ae.

These MRI images are from the same two patients illustrated in Fig. 1. Three longest linear measurements are delineated on each kidney over the largest cross-sectional longitudinal and transverse imaging planes before (*left*) and after (*right*) excluding exophytic cysts. **(A)** TKV was measured 723 mL before and 551 mL after exclusion of exophytic cysts (as a comparison, TKV in Fig. 1. was 956 mL before and 631 mL after exclusion of exophytic cysts). **(B)** TKV was measured 2,119 mL before and 857 mL after exclusion of exophytic cysts (as a comparison, TKV in Fig. 1. was 2,080 mL before and 845 mL after exclusion of exophytic cysts).

**Supplemental Table 1. Area under ROC curve with original versus recalculated htTKV**

| Model                          | All participants  | Class 1           | Class 2Ae         |
|--------------------------------|-------------------|-------------------|-------------------|
| Unadjusted, original htTKV     | 0.74 (0.70, 0.78) | 0.75 (0.71, 0.79) | 0.70 (0.47, 0.87) |
| Unadjusted, recalculated htTKV | 0.76 (0.72, 0.80) | 0.76 (0.71, 0.79) | 0.78 (0.56, 0.93) |
| Adjusted, original htTKV*      | 0.87 (0.83, 0.90) | 0.88 (0.84, 0.91) | 0.88 (0.65, 0.97) |
| Adjusted, recalculated htTKV*  | 0.88 (0.84, 0.90) | 0.88 (0.85, 0.91) | 0.91 (0.71, 0.99) |

\*Covariates in the adjusted model: baseline age, eGFR, BMI, sex and race

**Supplemental Table 2. Predicted %CKD with original versus recalculated htTKV**

| Model                          | All participants      | Class 1               | Class 2Ae             |
|--------------------------------|-----------------------|-----------------------|-----------------------|
| Unadjusted, original htTKV     | 29.91% (25.75, 34.34) | 29.43% (25.18, 33.95) | 39.13% (19.71, 61.46) |
| Unadjusted, recalculated htTKV | 30.57% (26.38, 35.01) | 31.26% (26.93, 35.85) | 17.39% (4.95, 38.78)  |
| Adjusted, original htTKV*      | 44.52% (39.85, 49.26) | 43.53% (38.76, 48.39) | 63.64% (40.66, 82.80) |
| Adjusted, recalculated htTKV*  | 44.07% (39.41, 48.81) | 44.00% (39.22, 48.86) | 45.45% (24.39, 67.79) |

\*Covariates in the adjusted model: baseline age, eGFR, BMI, sex and race

Predicted probability > 0.5.

**Supplemental Table 3. Goodness of Fit P-value according to Hosmer-Lemeshow test**

| Model                          | All participants | Class 1 | Class 2Ae |
|--------------------------------|------------------|---------|-----------|
| Unadjusted, original htTKV     | 0.4598           | 0.7164  | 0.0138    |
| Unadjusted, recalculated htTKV | 0.5967           | 0.4805  | 0.8260    |
| Adjusted, original htTKV*      | 0.2749           | 0.4322  | 0.0025    |
| Adjusted, recalculated htTKV*  | 0.2411           | 0.1883  | 0.3130    |

\*Covariates in the adjusted model: baseline age, eGFR, BMI, sex and race

Less significance implies better fit.

**Supplemental Table 4. TKV measured using slice-by-slice vs ellipsoid methods in Class 2Ae before and after exclusion of exophytic cysts**

| Case No. | Slice-by-slice (mL) |           | Ellipsoid (mL) |           |
|----------|---------------------|-----------|----------------|-----------|
|          | Inclusion           | Exclusion | Inclusion      | Exclusion |
| 1        | 537                 | 394       | 781            | 442       |
| 2        | 603                 | 449       | 604            | 464       |
| 3        | 716                 | 350       | 834            | 470       |
| 4        | 756                 | 533       | 1007           | 639       |
| 5        | 804                 | 329       | 769            | 383       |
| 6        | 821                 | 427       | 697            | 499       |
| 7        | 860                 | 550       | 980            | 343       |
| 8        | 888                 | 555       | 748            | 540       |
| 9        | 956                 | 631       | 723            | 551       |
| 10       | 1021                | 556       | 1124           | 583       |
| 11       | 1040                | 493       | 1443           | 618       |
| 12       | 1103                | 565       | 1189           | 410       |
| 13       | 1235                | 568       | 1303           | 791       |
| 14       | 1286                | 836       | 1526           | 599       |
| 15       | 1305                | 661       | 1433           | 740       |
| 16       | 1345                | 901       | 1590           | 768       |
| 17       | 1458                | 729       | 1489           | 820       |
| 18       | 1535                | 807       | 1811           | 772       |
| 19       | 1643                | 863       | 1722           | 882       |
| 20       | 2032                | 796       | 1986           | 626       |
| 21       | 2080                | 845       | 2119           | 857       |
| 22       | 2351                | 1215      | 2617           | 1134      |
| 23       | 2384                | 1367      | 2684           | 1060      |
| 24       | 3374                | 1703      | 3607           | 1940      |
| 25       | 4379                | 2126      | 5197           | 2050      |

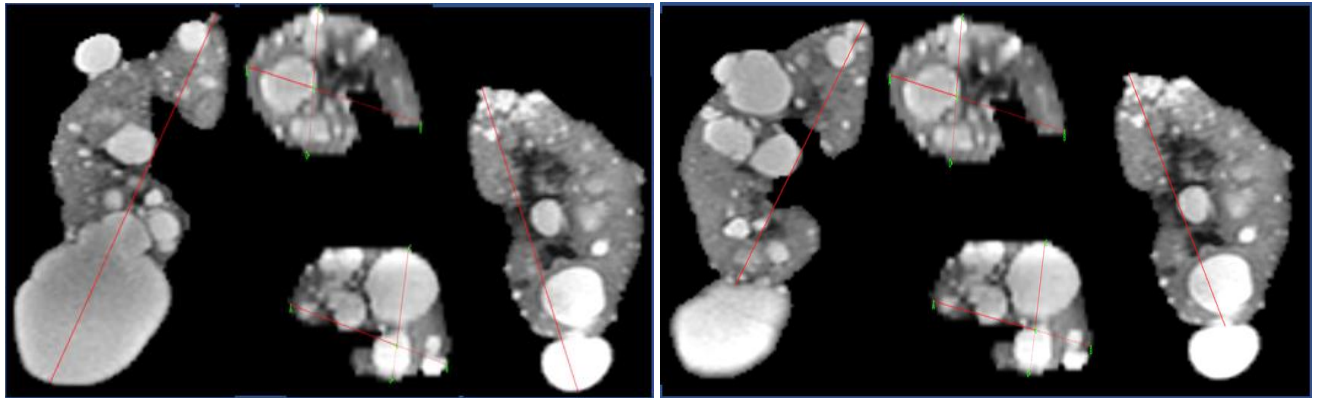

(A)

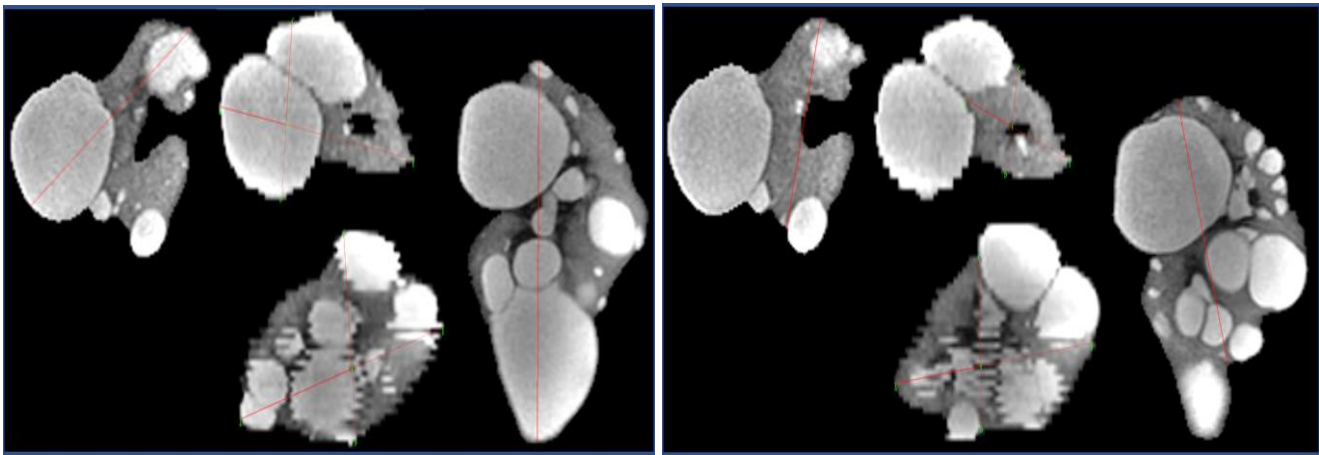

(B)

**Supplemental Figure 1. TKV measurement using ellipsoid method in two patients with Class 2Ae.** These MRI images are from the same two patients illustrated in Fig. 1. Three longest linear measurements (red lines) are delineated on each kidney over the largest cross-sectional longitudinal and transverse imaging planes before (*left*) and after (*right*) excluding exophytic cysts. **(A)** TKV was measured 723 mL before and 551 mL after exclusion of exophytic cysts (in comparison, TKV in Fig. 1. was 956 mL before and 631 mL after exclusion of exophytic cysts). **(B)** TKV was measured 2,119 mL before and 857 mL after exclusion of exophytic cysts (in comparison, TKV in Fig. 1. was 2,080 mL before and 845 mL after exclusion of exophytic cysts).
